# Supplementary material for: An increase in red blood cell distribution width from baseline predicts mortality in patients with severe sepsis or septic shock
Source: Crit Care. 2013 Dec 9;17(6):R282. doi: 10.1186/cc13145 (PMC4056357; doi:10.1186/cc13145)
Supplement: Additional file 1: Table S1 — Comparisons of clinical and biochemical variables according to red blood cell distribution width (RDW) level at baseline and at 72 hours. Table S2: Cox proportional hazards analyses for 28-day and 90-day mortality according to the changes in RDW. [file cc13145-S1.pdf]

**Supplementary Table 1. Comparisons of clinical and biochemical variables according to RDW level at baseline and 72-hour**

| Variables                            | Total<br>(n = 329) | Groups based on RDW levels at baseline and 72-hour† |                     |                     |                     | P-value |
|--------------------------------------|--------------------|-----------------------------------------------------|---------------------|---------------------|---------------------|---------|
|                                      |                    | Group 1<br>(n = 208)                                | Group 2<br>(n = 11) | Group 3<br>(n = 21) | Group 4<br>(n = 89) |         |
| Demographic data                     |                    |                                                     |                     |                     |                     |         |
| Age (years)                          | 64.4±15.6          | 62.8±16.3                                           | 68.3±11.9           | 66.3±17.2           | 66.9±13.7           | 0.147   |
| Male, n (%)                          | 161 (48.9%)        | 93 (44.7%)                                          | 6 (54.5%)           | 10 (47.6%)          | 52 (58.4%)          | 0.183   |
| MAP (mmHg)                           | 60.0±8.3           | 60.0±8.6                                            | 59.5±4.8            | 59.1±4.8            | 60.3±8.9            | 0.943   |
| BMI (kg/m²)                          | 23.0±3.9           | 23.4±3.8                                            | 22.3±2.2            | 23.0±2.9            | 22.3±4.4            | 0.183   |
| APACHE II score                      | 17.5±7.3           | 15.8±6.6                                            | 14.7±6.8            | 19.5±6.8            | 21.3±7.5            | <0.001  |
| SOFA score                           | 8.1±2.8            | 7.5±2.6                                             | 8.9±2.5             | 9.1±3.3             | 9.0±2.9             | <0.001  |
| Charlson comorbidity index           | 1.4±1.5            | 1.1±1.3                                             | 1.6±1.6             | 1.6±1.7             | 1.9±1.6             | 0.001   |
| Biochemical data                     |                    |                                                     |                     |                     |                     |         |
| RDW at baseline (%)                  | 14.0±1.6           | 13.0±0.7                                            | 15.0±0.4            | 14.2±0.3            | 16.1±1.2            | <0.001  |
| RDW at 72-hour (%)                   | 14.1±1.6           | 13.2±0.7                                            | 14.1±0.4            | 14.8±0.2            | 16.1±1.3            | <0.001  |
| WBC (x 10³/mm³)                      | 13.9±9.3           | 13.8±8.8                                            | 11.9±5.5            | 13.9±9.2            | 14.3±10.7           | 0.879   |
| Hemoglobin (g/dL)                    | 12.4±2.1           | 12.9±2.0                                            | 11.8±2.2            | 11.5±1.8            | 11.7±2.0            | <0.001  |
| Hematocrit (%)                       | 37.1±5.9           | 37.9±5.7                                            | 35.2±5.8            | 34.6±6.0            | 35.6±6.3            | 0.006   |
| CRP (mg/dL)                          | 15.2±11.3          | 14.9±11.0                                           | 8.3±9.0             | 17.2±9.6            | 16.2±12.4           | 0.140   |
| Creatinine (mg/dL)                   | 2.1±1.8            | 1.9±1.5                                             | 1.8±1.8             | 2.3±2.1             | 2.5±2.2             | 0.020   |
| eGFR (mL/min/1.73m²)                 | 54.0±27.7          | 54.1±26.9                                           | 63.5±21.6           | 52.7±27.2           | 52.9±30.6           | 0.719   |
| Albumin (g/dL)                       | 3.3±0.7            | 3.5±0.6                                             | 3.2±0.7             | 3.0±0.7             | 2.9±0.8             | <0.001  |
| Total cholesterol (mg/dL)            | 128.7±43.0         | 135.2±40.2                                          | 135.6±64.9          | 128.9±48.1          | 112.4±41.3          | <0.001  |
| Total bilirubin (mg/dL)              | 1.3±1.5            | 1.1±1.1                                             | 2.0±3.4             | 1.5±1.2             | 1.4±1.9             | 0.168   |
| pH                                   | 7.42±0.10          | 7.43±0.07                                           | 7.36±0.22           | 7.40±0.16           | 7.41±0.09           | 0.075   |
| Bicarbonate (mEq/L)                  | 21.0±5.0           | 21.1±4.9                                            | 21.3±5.1            | 20.8±5.6            | 20.6±6.1            | 0.094   |
| Lactate (mmol/L)                     | 3.40±2.80          | 2.96±2.42                                           | 4.12±3.38           | 5.00±4.91           | 3.96±2.66           | 0.001   |
| Infection sites, n (%)               |                    |                                                     |                     |                     |                     | 0.001   |
| Pneumonia                            | 80 (24.3%)         | 34 (16.3%)                                          | 6 (54.5%)           | 5 (23.8%)           | 35 (39.3%)          |         |
| Urinary tract                        | 81 (24.6%)         | 65 (31.3%)                                          | 1 (9.1%)            | 2 (9.5%)            | 13 (14.6%)          |         |
| Intra-abdominal sites                | 72 (21.9%)         | 50 (24.0%)                                          | 3 (27.3%)           | 5 (23.8%)           | 14 (15.7%)          |         |
| Other                                | 71 (21.6%)         | 45 (21.6%)                                          | 1 (9.1%)            | 7 (33.3%)           | 18(20.2%)           |         |
| Multiple sites                       | 25 (7.6%)          | 14 (6.7%)                                           | -                   | 2 (9.5%)            | 9 (10.1%)           |         |
| Acute kidney injury, n (%)‡          | 174 (52.9%)        | 103 (49.5%)                                         | 4 (36.4%)           | 14 (66.7%)          | 53 (59.6%)          | 0.149   |
| RRT, n (%)                           | 54 (16.4%)         | 16 (7.7%)                                           | 3 (27.3%)           | 6 (28.6%)           | 29 (32.6%)          | <0.001  |
| 28-day mortality, n (%)              | 33 (10%)           | 7 (3.4%)                                            | 2 (18.2%)           | 3 (14.3%)           | 21 (23.6%)          | <0.001  |
| 90-day mortality, n (%)              | 48 (14.6%)         | 12 (5.8%)                                           | 2 (18.2%)           | 6 (28.6%)           | 28 (31.5%)          | <0.001  |
| Total length of hospital stay (days) | 19.3±22.8          | 15.1±11.3                                           | 20.0±22.6           | 10.6±2.7            | 33.8±41.9           | <0.001  |

Data are expressed as mean (with SD) or n (%).

RDW, red cell distribution width;  $\Delta$ RDW<sub>72hr-adm</sub>, RDW at 72-hour – RDW at baseline; MAP, mean arterial pressure; BMI, body mass index; WBC, white blood cell; CRP, C-reactive protein; eGFR, estimated glomerular filtration rate; RRT, renal replacement therapy.

†The group 1 was defined as patients with normal RDW at both time points, the group 2 as patients with increased RDW at baseline and normal RDW at 72-hour, the group 3 as patients with normal RDW and increased RDW at 72-hour, and the group 4 as patients with increased RDW at both time points.

‡Acute kidney injury was defined as any of the following: (i) increase in serum creatinine by  $\geq 0.3$  mg/dL within 48 hours, (ii)

---

increase in serum creatinine to  $\geq 1.5$  times baseline which is known or presumed to have occurred within the prior 7 days,  
(iii) urine volume  $< 0.5\text{ml/kg/hour}$  for 6 hours.

**Supplementary Table 2. Cox proportional hazards analyses for 28-day and 90-day mortality according to the changes in RDW**

| Groups based on RDW<br>levels at baseline and<br>72-hour | Unadjusted Model  |         | Adjusted Model 1  |         | Adjusted Model 2  |         |
|----------------------------------------------------------|-------------------|---------|-------------------|---------|-------------------|---------|
|                                                          | HR (95% CI)       | P-value | HR (95% CI)       | P-value | HR (95% CI)       | P-value |
| <b>28-day mortality</b>                                  |                   |         |                   |         |                   |         |
| Group 1                                                  | 1.0               | -       | 1.0               | -       | 1.0               | -       |
| Group 2                                                  | 5.72 (1.19-27.56) | 0.030   | 3.59 (0.63-20.50) | 0.150   | 3.55 (0.57-22.17) | 0.176   |
| Group 3                                                  | 4.60 (1.19-17.81) | 0.027   | 1.41 (0.20-9.88)  | 0.724   | 1.18 (0.15-9.10)  | 0.871   |
| Group 4                                                  | 7.93 (3.37-18.67) | <0.001  | 5.70 (2.03-15.99) | 0.001   | 5.38 (1.84-15.68) | 0.002   |
| <b>90-day mortality</b>                                  |                   |         |                   |         |                   |         |
| Group 1                                                  | 1.0               | -       | 1.0               | -       | 1.0               | -       |
| Group 2                                                  | 3.45 (0.77-15.41) | 0.105   | 1.81 (0.37-8.81)  | 0.461   | 1.51 (0.29-7.77)  | 0.621   |
| Group 3                                                  | 5.60 (2.10-14.91) | 0.001   | 2.42 (0.73-8.10)  | 0.151   | 2.45 (0.70-8.57)  | 0.159   |
| Group 4                                                  | 6.47 (3.29-12.74) | <0.001  | 3.65 (1.63-8.15)  | 0.002   | 3.31 (1.45-7.56)  | 0.005   |

RDW, red cell distribution width.

Unadjusted Model: crude relative risk

Adjusted Model 1: adjusted for age, sex, SOFA score, Charlson Comorbidity Index, renal replacement therapy, albumin, hemoglobin, lactate, and C-reactive protein

Adjusted Model 2: Model 1 plus adjustment for infection site

**Supplementary Figure 1.** Kaplan-Meier plots for cumulative 28-day (A) and 90-day (B) survival according to the changes in RDW during first 72 hours.

Group 1 was defined as patients with normal RDW at both time points, group 2 as patients with increased RDW at baseline and normal RDW at 72-hour, group 3 as patients with normal RDW and increased RDW at 72-hour, and group 4 as patients with increased RDW at both time points. ( $P < 0.001$  by log-rank test for overall comparison among groups in both 28-day and 90-day cumulative survival plots)
